# Supplementary material for: Determination of the evolutionary pressure on Camellia oleifera on Hainan Island using the complete chloroplast genome sequence
Source: PeerJ. 2019 Jun 26;7:e7210. doi: 10.7717/peerj.7210 (PMC6599451; doi:10.7717/peerj.7210)
Supplement: Supplemental Information 2 [file peerj-07-7210-s002.xlsx]

## Sheet: Sheet1
		No.SSRs
Repeat unit	Repeat number	C. oleifera Hainan	C. oleifera	C. luteoflora	C. grandibracteata	C. sinensis	C. leptophylla	C. pubicosta	C. crapnelliana	C. huana	C. danzaiensis
AG/CT	4	5	6	6	6	6	6	6	6	6	6
AT/AT	4	12	13	12	12	12	12	12	12	12	12
	5	3	3	3	3	3	3	3	3	3	3
GA/TC	4	8	10	10	10	10	10	10	10	10	10
TA/TA	4	9	10	9	9	9	9	9	9	9	9
	5	1	2	1	1	1	1	1	1	1	1
TTC/GAA	4	1	1	1	1	1	1	1	1	1	1
ATT/AAT										1
AAAG/CTTT	3	1		1	1	1	1	2	1	1	1
AAAT/ATTT	3	2	2	2	2	2	2	2	2	2	2
AATA/TATT	3	1	1	1	1	1	1	1	1	1	1
AGAT/ATCT	3	1	1	1	1	1	1	1	1	1	1
ATAG/CTAT	3	1	1	1	1	1	1	1	1	1	1
CCCT/AGGG	3	1		1		1	1		1	1	1
GAAA/TTTC	3	2	2	2	2	2	2	2	2	2	2
GTCT/AGAC	3	1	1	1	1	1	1	1	1	1	1
TCTA/TAGA	3	1	1	1	1	1	1	1	1	1	1
GAGG/CCTC	3		1
TCTT/AAGA	3	1	1	1	1		1	1	1	1	1
CTTTTT/AAAAAG	3		2		2	2	2	2	2	2
ATTTGA/TCAAAT											1
TACAAA/TTTGTA											1
